# Supplementary material for: Higher platelet count, even within normal range, is associated with increased arterial stiffness in young and middle-aged adults
Source: publisher site journal article supplement (doi:10.18632/aging.204335), 2022-10-14
Supplement: Supplementary file [file aging-v14i19-204335-supplementary-material-SD1.pdf]

## SUPPLEMENTARY FIGURES

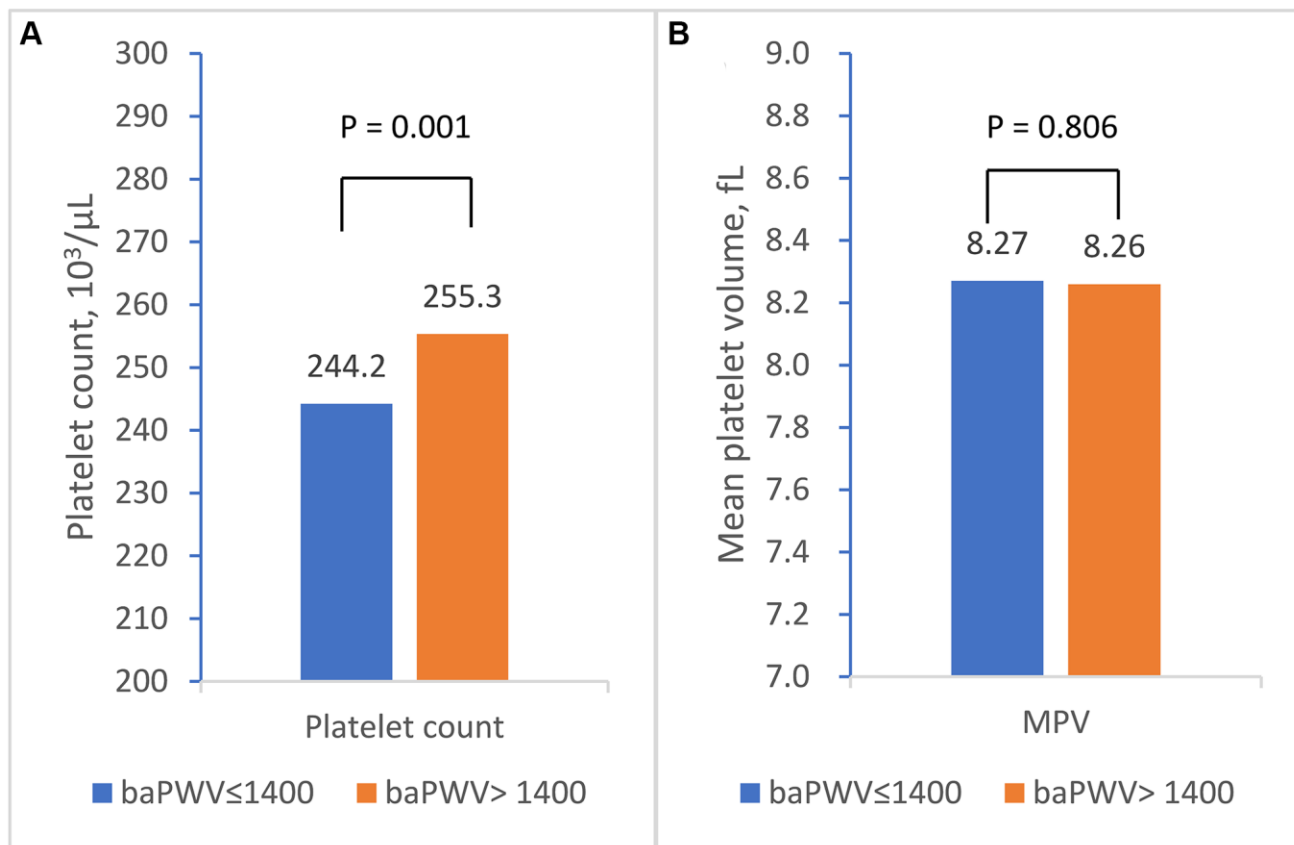

**Supplementary Figure 1. The relationship between platelet-associated parameters and increased arterial stiffness (baPWV  $>$ 1,400 cm/s) in males by independent *t*-test. (A) Comparisons of platelet count between subjects with and without increased arterial stiffness. (B) Comparisons of mean platelet volume subjects with and without increased arterial stiffness. The orange and blue bars represent the mean levels in subjects with and without increased arterial stiffness, respectively. A *P* value  $<$  0.05 was defined as statistically significant. Abbreviations: baPWV: brachial-ankle pulse wave velocity; MPV: mean platelet volume.**

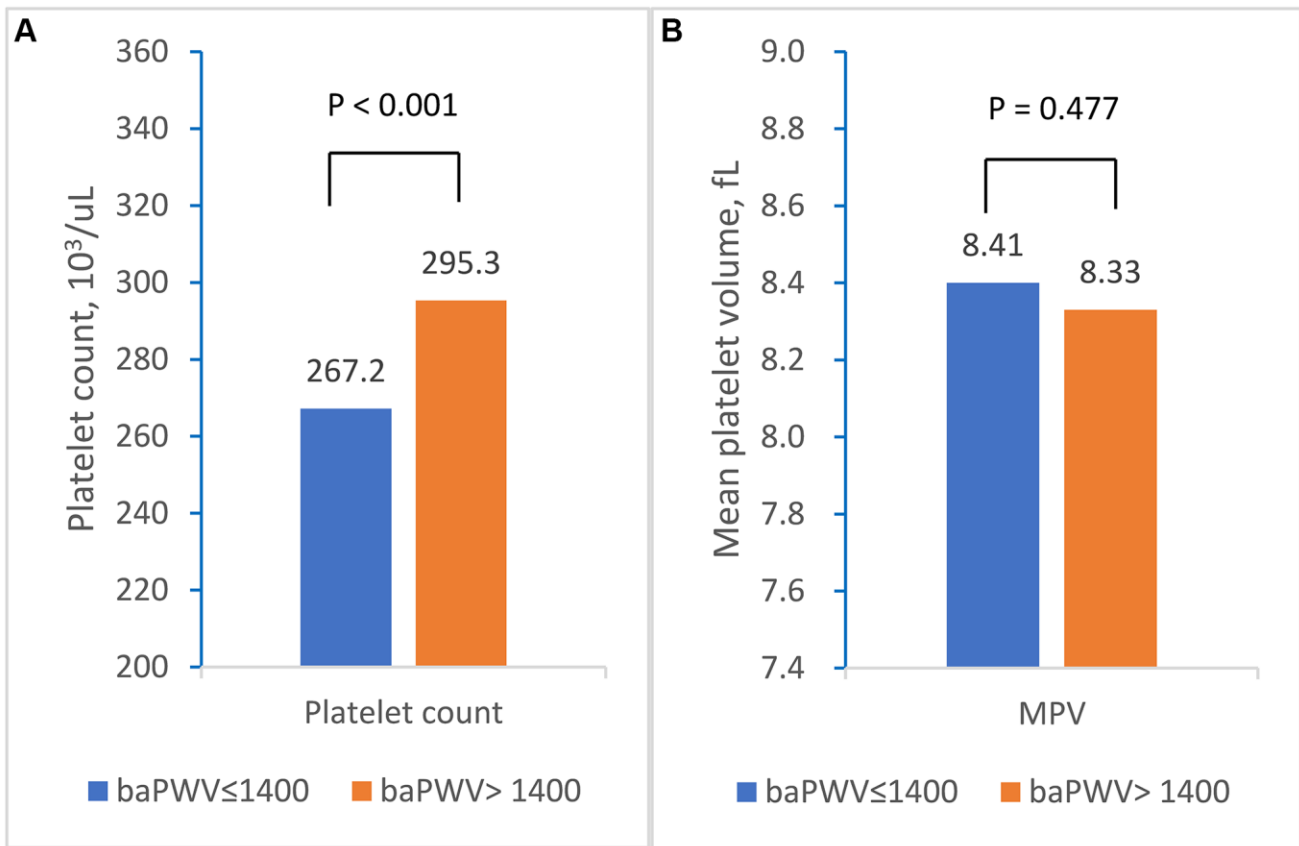

**Supplementary Figure 2. The relationship between platelet-associated parameters and increased arterial stiffness (baPWV >1,400 cm/s) in females by independent *t*-test.** (A) Comparisons of platelet count between subjects with and without increased arterial stiffness. (B) Comparisons of mean platelet volume subjects with and without increased arterial stiffness. The orange and blue bars represent the mean levels in subjects with and without increased arterial stiffness, respectively. A *P* value < 0.05 was defined as statistically significant. Abbreviations: baPWV: brachial-ankle pulse wave velocity; MPV: mean platelet volume.
