# Supplementary material for: Higher platelet count, even within normal range, is associated with increased arterial stiffness in young and middle-aged adults
Source: publisher site journal article supplement (doi:10.18632/aging.204335), 2022-10-14
Supplement: Supplementary file [file aging-v14i19-204335-supplementary-material-SD2.pdf]

## SUPPLEMENTARY TABLES

**Supplementary Table 1. Comparisons of clinical characteristics among subjects with and without increased arterial stiffness (baPWV >1,400 cm/s) in males and females.**

| Variables                | Male                         |               | P value | Female                       |              | P value |
|--------------------------|------------------------------|---------------|---------|------------------------------|--------------|---------|
|                          | Increased arterial stiffness |               |         | Increased arterial stiffness |              |         |
|                          | No (n = 1,190)               | Yes (n = 275) |         | No (n = 935)                 | Yes (n = 64) |         |
| Age, years               | 40.6 ± 6.3                   | 43.5 ± 4.9    | <0.001  | 39.5 ± 6.7                   | 44.8 ± 4.5   | <0.001  |
| Hypertension             | 103 (8.7)                    | 118 (42.9)    | <0.001  | 22 (2.4)                     | 26 (40.6)    | <0.001  |
| Diabetes mellitus        | 31 (2.6)                     | 20 (7.3)      | <0.001  | 15 (1.6)                     | 2 (3.1)      | 0.363   |
| Hyperuricemia            | 477 (40.1)                   | 138 (50.2)    | 0.002   | 113 (12.2)                   | 10 (15.6)    | 0.404   |
| Current alcohol use      | 258 (21.7)                   | 76 (27.6)     | 0.020   | 60 (6.4)                     | 9 (14.1)     | 0.034   |
| Current smoking          | 232 (19.5)                   | 66 (24.0)     | 0.094   | 28 (3.0)                     | 5 (7.8)      | 0.037   |
| Exercise ≥ 3/wk          | 564 (47.4)                   | 126 (45.8)    | 0.637   | 371 (39.7)                   | 31 (48.4)    | 0.167   |
| BMI, kg/m <sup>2</sup>   | 24.7 ± 3.4                   | 25.8 ± 3.4    | <0.001  | 22.1 ± 3.6                   | 23.7 ± 4.1   | 0.001   |
| SBP, mmHg                | 119.5 ± 10.5                 | 134.6 ± 13.3  | <0.001  | 108.2 ± 10.6                 | 135.8 ± 14.4 | <0.001  |
| DBP, mmHg                | 72.0 ± 8.5                   | 84.8 ± 10.2   | <0.001  | 63.2 ± 8.2                   | 81.3 ± 11.4  | <0.001  |
| FPG, mg/dL               | 93.6 ± 15.1                  | 99.9 ± 31.5   | 0.001   | 88.4 ± 11.4                  | 94.5 ± 11.5  | <0.001  |
| ALT, U/L                 | 35.2 ± 24.1                  | 42.9 ± 28.5   | <0.001  | 21.4 ± 29.1                  | 21.8 ± 12.3  | 0.907   |
| AST, U/L                 | 26.5 ± 12.7                  | 29.1 ± 12.7   | 0.003   | 21.4 ± 17.1                  | 21.8 ± 7.4   | 0.996   |
| Cholesterol, mg/dL       | 189.8 ± 33.7                 | 198.7 ± 35.9  | <0.001  | 181.4 ± 32.9                 | 196.7 ± 36.8 | <0.001  |
| Triglyceride, mg/dL      | 135.1 ± 86.1                 | 159.9 ± 91.7  | <0.001  | 87.6 ± 47.5                  | 111.8 ± 62.8 | 0.003   |
| HDL-C, mg/dL             | 48.8 ± 12.5                  | 46.9 ± 13.2   | 0.027   | 62.5 ± 15.5                  | 56.6 ± 14.3  | 0.004   |
| LDL-C, mg/dL             | 135.7 ± 33.1                 | 142.8 ± 35.3  | 0.002   | 120.8 ± 32.1                 | 138.8 ± 34.4 | <0.001  |
| Cholesterol/HDL-C        | 4.1 ± 1.2                    | 4.5 ± 1.3     | <0.001  | 3.1 ± 0.9                    | 3.6 ± 0.9    | <0.001  |
| Creatinine, mg/dL        | 0.86 ± 0.13                  | 0.85 ± 0.13   | 0.413   | 0.58 ± 0.11                  | 0.57 ± 0.12  | 0.284   |
| Uric acid, mg/dL         | 6.8 ± 1.3                    | 7.0 ± 1.3     | 0.005   | 4.8 ± 1.1                    | 5.3 ± 1.2    | 0.001   |
| WBC, 10 <sup>3</sup> /μL | 5.8 ± 1.5                    | 6.2 ± 1.6     | <0.001  | 5.7 ± 1.6                    | 5.9 ± 1.5    | 0.269   |
| RBC, 10 <sup>6</sup> /μL | 5.14 ± 0.45                  | 5.22 ± 0.44   | 0.005   | 4.51 ± 0.44                  | 4.71 ± 0.37  | <0.001  |
| Hemoglobin, g/dL         | 15.3 ± 1.0                   | 15.6 ± 1.0    | <0.001  | 12.9 ± 1.3                   | 13.0 ± 1.8   | 0.679   |
| hs-CRP, mg/L             | 1.85 ± 2.72                  | 2.67 ± 4.11   | 0.002   | 1.93 ± 4.47                  | 3.05 ± 4.86  | 0.078   |

Data expressed as mean ± standard deviation or number (percent). Abbreviations: baPWV: brachial-ankle pulse wave velocity; ALT: alanine aminotransferase; AST: aspartate aminotransferase; BMI: body mass index; DBP: diastolic blood pressure; FPG: fasting plasma glucose; HDL-C: high-density lipoprotein-cholesterol; hs-CRP: high sensitivity C-reactive protein; LDL-C: low-density lipoprotein-cholesterol; RBC: red blood cell; SBP: systolic blood pressure; WBC: white blood cell.

**Supplementary Table 2. Logistic regression model for increased arterial stiffness (baPWV >1,400 cm/s) with platelet count and mean platelet volume levels in males.**

| Variables                              | Crude OR (95% CI) | P value | Adjusted OR <sup>a</sup> (95% CI) | P value |
|----------------------------------------|-------------------|---------|-----------------------------------|---------|
| <b>Platelet count, quartiles</b>       |                   |         |                                   |         |
| Q1 (150~209, 10 <sup>3</sup> /μL)      | Reference         |         | Reference                         |         |
| Q2 (210~241, 10 <sup>3</sup> /μL)      | 1.33 (0.89–1.99)  | 0.170   | 1.42 (0.91–2.22)                  | 0.120   |
| Q3 (242~274, 10 <sup>3</sup> /μL)      | 1.68 (1.14–2.48)  | 0.009   | 1.61 (1.04–2.48)                  | 0.032   |
| Q4 (275~450, 10 <sup>3</sup> /μL)      | 1.65 (1.12–2.44)  | 0.012   | 1.76 (1.14–2.73)                  | 0.011   |
| <b>Mean platelet volume, quartiles</b> |                   |         |                                   |         |
| Q1 (6.4~7.6 fL)                        | Reference         |         | Reference                         |         |
| Q2 (7.7~8.1 fL)                        | 0.78 (0.54–1.15)  | 0.207   | 1.32 (0.56–3.11)                  | 0.523   |
| Q3 (8.2~8.7 fL)                        | 0.80 (0.55–1.15)  | 0.230   | 1.05 (0.44–2.48)                  | 0.920   |
| Q4 (8.8~11.5 fL)                       | 0.88 (0.61–1.26)  | 0.477   | 1.04 (0.43–2.51)                  | 0.933   |

Abbreviations: baPWV: brachial-ankle pulse wave velocity; CI: confidence interval; OR: odds ratio. <sup>a</sup>adjusted for age, obesity, hypertension, diabetes, hyperuricemia, total cholesterol/high-density lipoprotein-cholesterol ratio, high sensitivity C-reactive protein, cigarette smoking and regular exercise.

**Supplementary Table 3. Logistic regression model for increased arterial stiffness (baPWV >1,400 cm/s) with platelet count and mean platelet volume levels in females.**

| Variables                              | Crude OR (95% CI) | P value | Adjusted OR <sup>a</sup> (95% CI) | P value |
|----------------------------------------|-------------------|---------|-----------------------------------|---------|
| <b>Platelet count, quartiles</b>       |                   |         |                                   |         |
| Q1 (152~223, 10 <sup>3</sup> /μL)      | Reference         |         | Reference                         |         |
| Q2 (224~261, 10 <sup>3</sup> /μL)      | 2.07 (0.77–5.53)  | 0.148   | 2.37 (0.77–7.30)                  | 0.133   |
| Q3 (262~304, 10 <sup>3</sup> /μL)      | 2.44 (0.93–6.39)  | 0.070   | 3.31 (1.09–10.01)                 | 0.034   |
| Q4 (306~450, 10 <sup>3</sup> /μL)      | 4.85 (1.98–11.92) | 0.001   | 3.94 (1.39–11.12)                 | 0.010   |
| <b>Mean platelet volume, quartiles</b> |                   |         |                                   |         |
| Q1 (6.3~7.7 fL)                        | Reference         |         | Reference                         |         |
| Q2 (7.8~8.2 fL)                        | 0.84 (0.61–1.16)  | 0.296   | 0.80 (0.53–1.22)                  | 0.308   |
| Q3 (8.3~8.8 fL)                        | 0.83 (0.60–1.14)  | 0.251   | 0.92 (0.62–1.39)                  | 0.703   |
| Q4 (8.9~11.8 fL)                       | 0.87 (0.64–1.20)  | 0.404   | 0.76 (0.51–1.13)                  | 0.177   |

Abbreviations: baPWV: brachial-ankle pulse wave velocity; CI: confidence interval; OR: odds ratio. <sup>a</sup>adjusted for age, obesity, hypertension, diabetes, hyperuricemia, total cholesterol/high-density lipoprotein-cholesterol ratio, high sensitivity C-reactive protein, cigarette smoking and regular exercise.
